# Supplementary material
Source: publisher figshare collection journal article supplement (https://acs.figshare.com/ndownloader/files/3719497)
Supplement: Supplementary file 1 [file 3719497]

# **Hg<sup>0</sup> capture over CoMoS/ $\gamma$ -Al<sub>2</sub>O<sub>3</sub> with MoS<sub>2</sub> nanosheet at low temperatures**

Haitao Zhao<sup>1</sup>, Gang Yang<sup>1</sup>, Xiang Gao<sup>2</sup>, Cheng Heng Pang<sup>1</sup>, Samuel W. Kingman<sup>3</sup>, and  
Tao Wu<sup>1,\*</sup>

<sup>1</sup>Municipal Key Laboratory of Clean Energy Conversion Technologies, The University of Nottingham Ningbo China, Ningbo 315100, P. R. China

<sup>2</sup>College of Energy Engineering, Zhejiang University, Hangzhou 310027, P. R. China

<sup>3</sup>Department of Chemical and Environmental Engineering, The University of Nottingham, Nottingham NG7 2RD, The UK

\*Corresponding author: phone: +86 (0) 574 88180269; fax: +86 (0) 574 8818 0175; email: tao.wu@nottingham.edu.cn

Number of pages: 8

Number of Figures: 7

## **List of Figures**

Figure 1S. Procedure for sample preparation

Figure 2S Schematic of the long-term evaluation of Hg<sup>0</sup> capture

Figure 3S. XPS spectra of (a) Mo 3d and (b) Co 2p for (i) CoMoO/ $\gamma$ -Al<sub>2</sub>O<sub>3</sub>, (ii) CoMoS/ $\gamma$ -Al<sub>2</sub>O<sub>3</sub>, spent CoMoS/ $\gamma$ -Al<sub>2</sub>O<sub>3</sub> experienced Hg<sup>0</sup> capture for (iii) 2000 min, and (iv) 2000 h

Figure 4S Dynamic transient behaviours of Hg<sup>0</sup> capture over the oxidized and sulphided forms of Co and Mo

Figure 5S. EDS analysis of the decomposition product

Figure 6S. TPDD analysis of the S/ $\gamma$ -Al<sub>2</sub>O<sub>3</sub> catalyst

Figure 7S The long-term evaluation of Hg<sup>0</sup> capture at 50°C

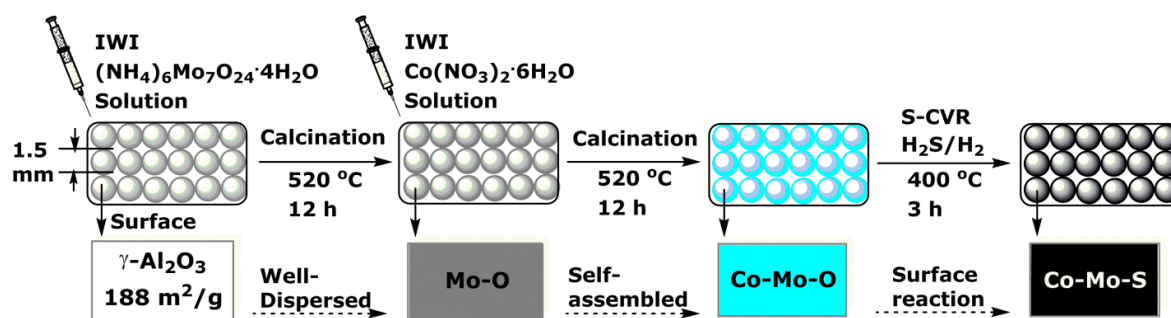

Figure 1S. Procedure for sample preparation

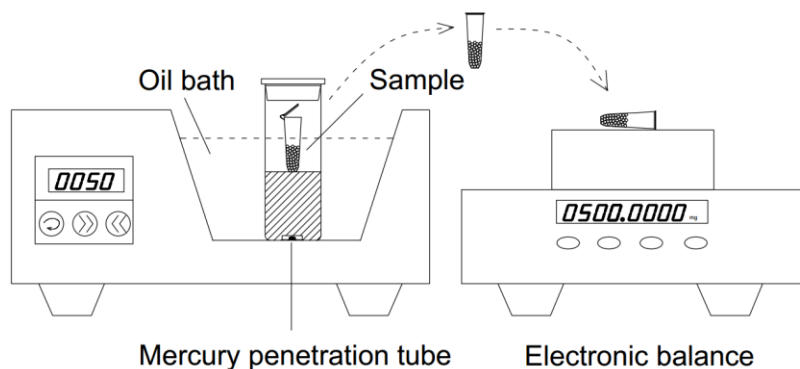

Figure 2S Schematic of the long-term evaluation of  $\text{Hg}^0$  capture

Three measures were taken to reduce the experimental errors. Firstly, an analytical balance with a  $10^{-4}$  mg resolution was used to record the change in mass. Secondly, a sample holder with a lid was designed to avoid contamination during the measurement of the mass change outside the mercury penetration tube. Finally, prior to the test, the mercury penetration tube was kept isothermal at 50 °C for 1 h to remove moisture and other adsorbed matters.

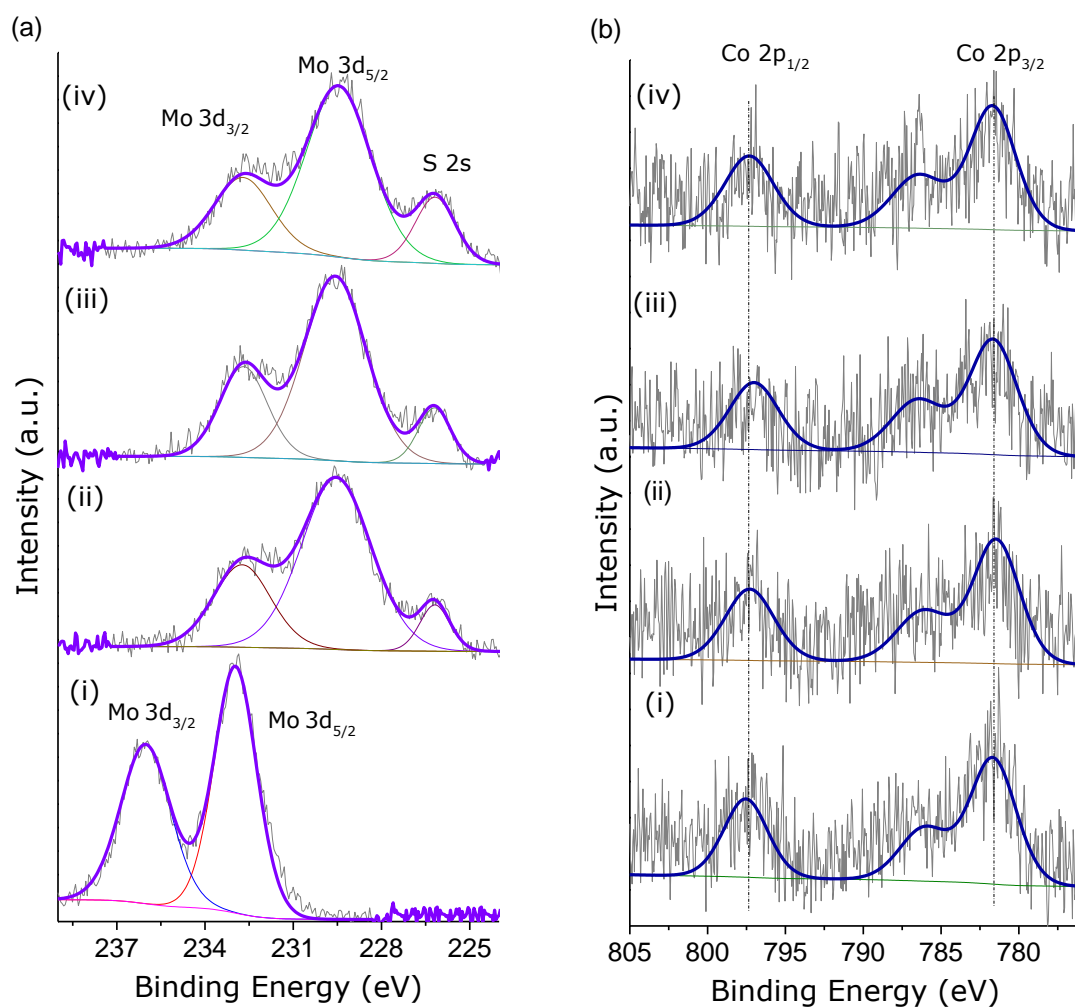

Figure 3S. XPS spectra of (a) Mo 3d and (b) Co 2p for (i) CoMoO/ $\gamma$ -Al<sub>2</sub>O<sub>3</sub>, (ii) CoMoS/ $\gamma$ -Al<sub>2</sub>O<sub>3</sub>, spent CoMoS/ $\gamma$ -Al<sub>2</sub>O<sub>3</sub> experienced Hg<sup>0</sup> capture for (iii) 2000 min, and (iv) 2000 h

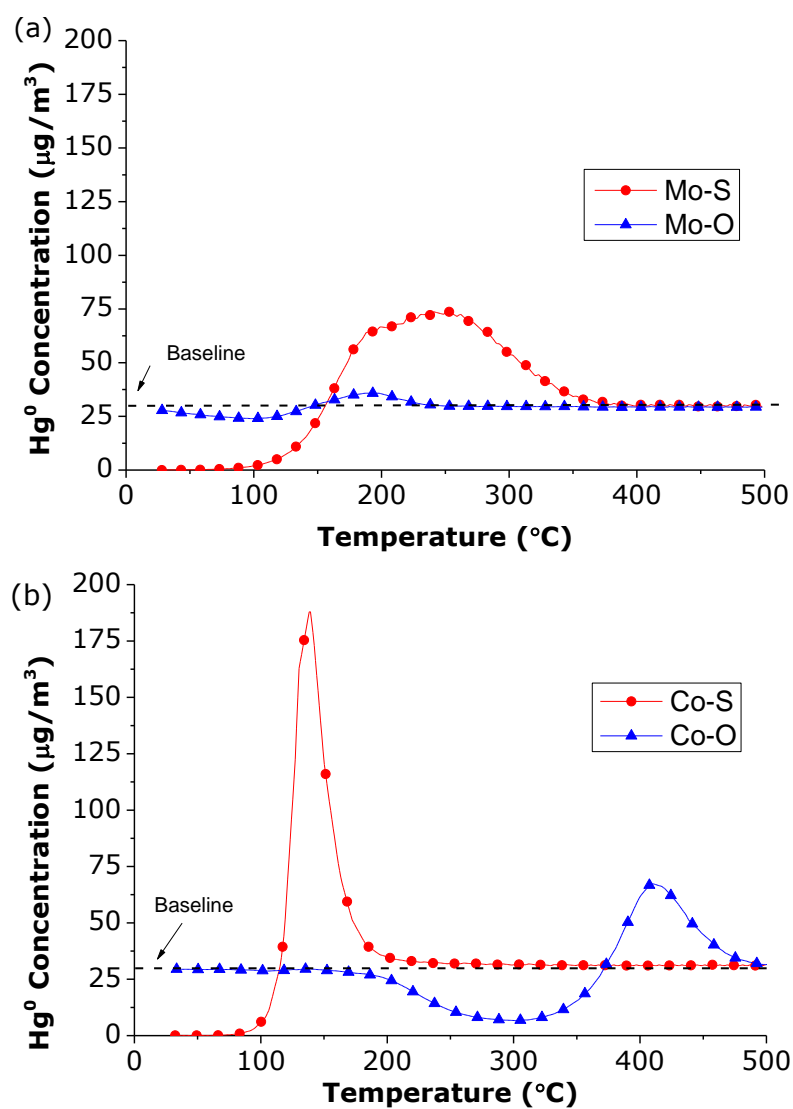

Figure 4S Dynamic transient behaviours of  $\text{Hg}^0$  capture over the oxidized and sulphided forms of Co and Mo

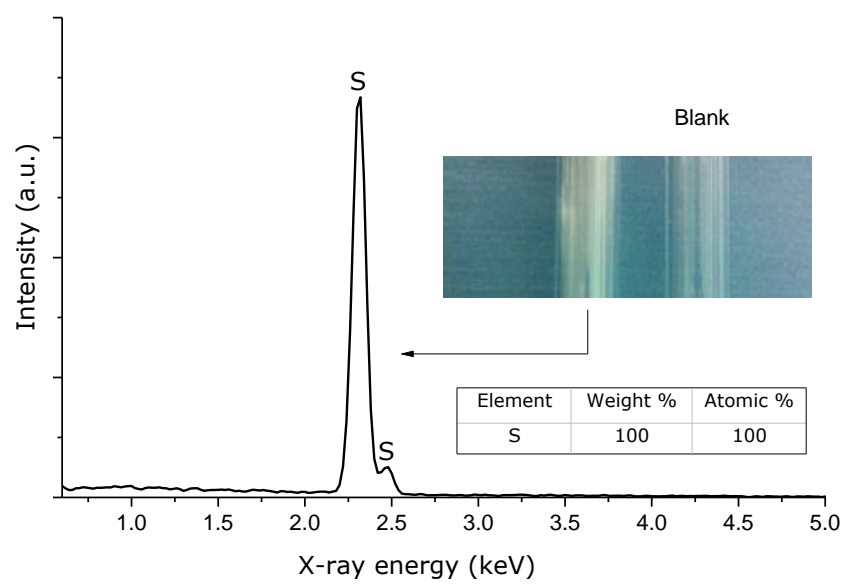

Figure 5S. EDS analysis of the decomposition product.

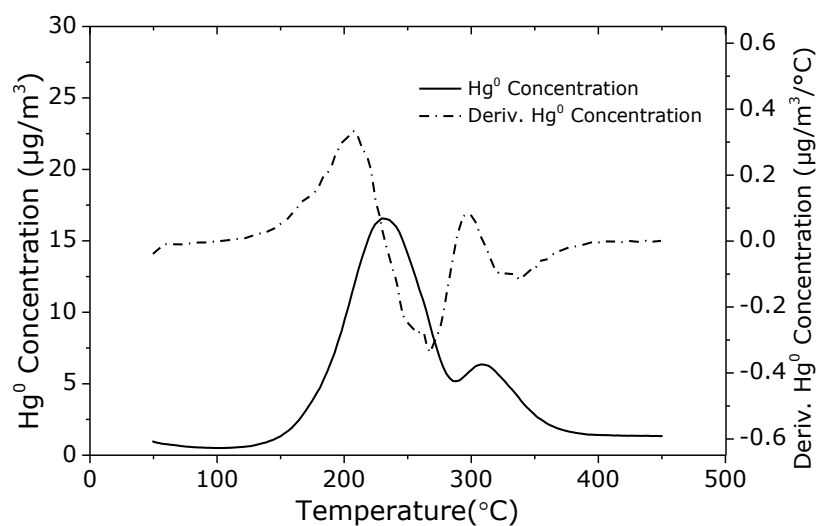

Figure 6S. TPDD analysis of the S/ $\gamma$ -Al<sub>2</sub>O<sub>3</sub> catalyst.

The space velocity was about 45 000 h<sup>-1</sup>. The sample was initially kept isothermal at 50°C in N<sub>2</sub>, exposed to a N<sub>2</sub> gas containing 30 μg/m<sup>3</sup> of Hg<sup>0</sup>, and then heated from 50°C to 450°C at a heating rate of 1°C/min.

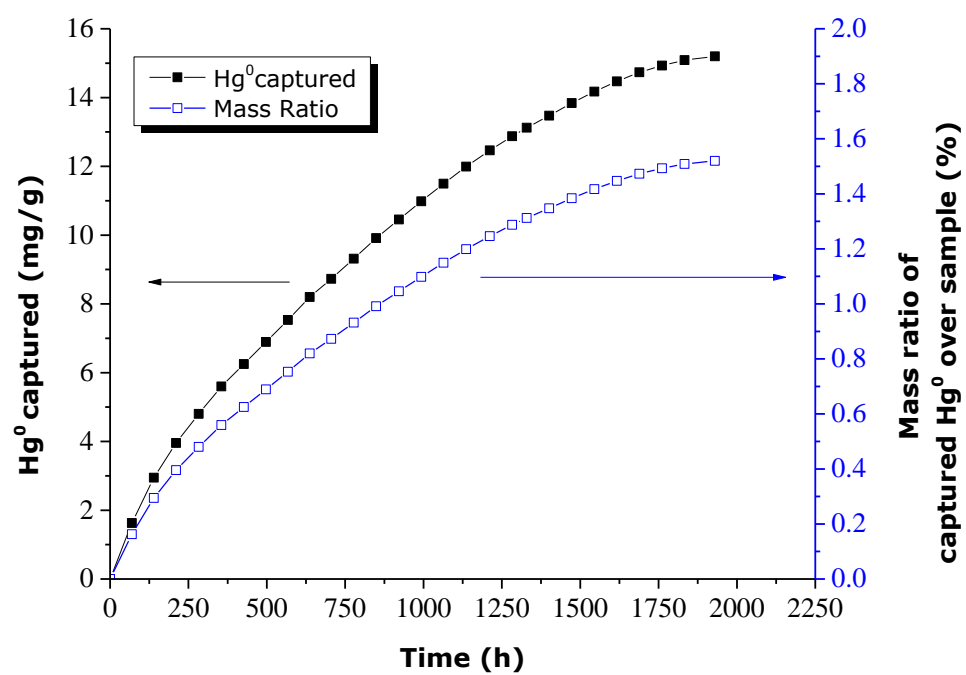

Figure 7S The long-term evaluation of Hg<sup>0</sup> capture at 50°C
